# Supplementary material for: Extract of Gardenia jasminoides Ellis Attenuates High-Fat Diet-Induced Glycolipid Metabolism Disorder in Rats by Targeting Gut Microbiota and TLR4/Myd88/NF-κB Pathway
Source: MDPI journal article supplement (doi:10.3390/antiox13030293), 2024-02-28
Supplement: s1 [file s1]

**Table S1.** High-fat diet formulation.

| <b>Raw Materials</b> | <b>Content (g/kg)</b> |
|----------------------|-----------------------|
| Casein               | 267                   |
| Maltodextrin         | 157                   |
| Sucrose              | 89                    |
| Soybean Oil          | 33                    |
| Lard                 | 301                   |
| Cellulose            | 67                    |
| Mineral Mix,M1020    | 66                    |
| Vitamin Mix,V1010    | 13                    |
| L-Cystine            | 4                     |
| Choline Bitartrate   | 3                     |
| TBHO                 | 0.067                 |
| Total                | 1000                  |
